# Supplementary material
Source: PubMed Central journal article supplement (PMC6679785)

# Supplemental Fig. S1

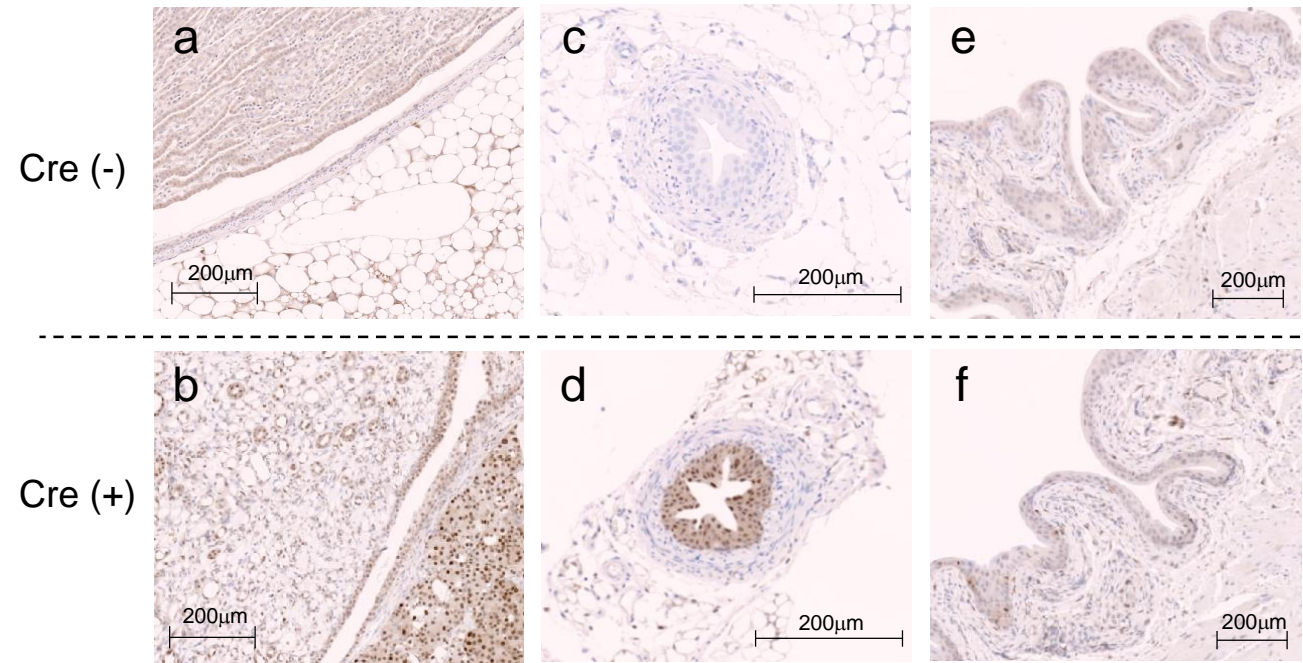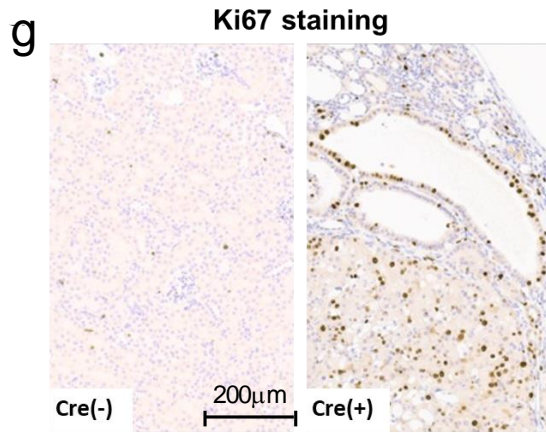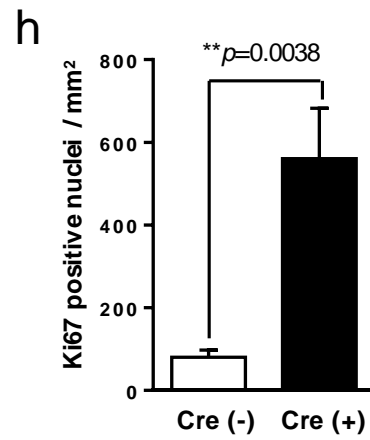

# Supplemental table S1

List of significant genes, *PRCC-TFE3*; *Cre* (-) kidneys vs *PRCC-TFE3*; *Cre* (+) kidneys , 4 month

a

| Gene Symbol   | RefSeq             | q-value     | Fold-Change |
|---------------|--------------------|-------------|-------------|
| Gpmb          | AK044764           | 0.000416623 | 78.6639     |
| Moxd1         | AK014340           | 0.000985109 | 51.6525     |
| Diras2        | AK041534           | 0.000985109 | 48.7425     |
| 2010320O07Rik | AK008598           | 0.000109735 | 46.1242     |
| Reln          | AK017094           | 0.000109735 | 33.2644     |
| Tgfb2         | AK029306           | 0.00198227  | 24.1486     |
| P2rx7         | AK144585           | 0.00113265  | 17.5562     |
| Tyvp1         | AK148332           | 0.00631762  | 16.5856     |
| Cd68          | AK002264           | 0.0086153   | 14.4758     |
| Nr4a1         | AK004709           | 0.0015723   | 12.498      |
| Ngfr          | AK037248           | 0.000109735 | 11.3874     |
| Tmem48        | BC021337           | 0.000109735 | 9.92223     |
| 2310043M15Rik | AK009785           | 0.0144736   | 9.70661     |
| Snap91        | AK051176           | 0.00500623  | 8.98251     |
| Ramp3         | AK005513           | 0.00178121  | 8.7271      |
| Gpr143        | AK033060           | 0.00409095  | 7.17645     |
| Tnni3k        | AY526095           | 0.0192969   | 7.14765     |
| Mreg          | AY628210           | 0.0263642   | 6.51775     |
| Slc24a5       | AB085629           | 0.00113265  | 6.28298     |
| I700019D03Rik | AK006110           | 0.00556483  | 5.83014     |
| Ret           | AK044686           | 0.00970173  | 5.75676     |
| Eno3          | AK002485           | 0.00205155  | 5.39912     |
| Mcoln3        | AK030819           | 0.0272396   | 5.0489      |
| Plcxd2        | BC151059           | 0.0192969   | 4.88445     |
| Zdhhc2        | AK017566           | 0.049694    | 4.65102     |
| Hgsnat        | AK020410           | 0.00754542  | 4.49098     |
| Wdr16         | BC118541           | 0.0173587   | 4.46835     |
| Gm3601        | XR_105655          | 0.0323598   | 4.40033     |
| Abp1          | AK005423           | 0.0376708   | 4.32644     |
| Cyp4f39       | AK028950           | 0.0354973   | 4.31285     |
| Cdkn3         | AK010426           | 0.0113192   | 4.28555     |
| Gm3601        | XR_105655          | 0.0263642   | 4.28038     |
| Gm17225       | ENSMUST00000172051 | 0.00775342  | 4.116       |
| Ivl           | AK003807           | 0.0015723   | 4.11046     |
| Aox3          | BC024046           | 0.00638355  | 3.9723      |
| Hk2           | AK036845           | 0.0130043   | 3.92369     |
| Tshr          | AK014519           | 0.0406393   | 3.87178     |
| Fkbp11        | BC021345           | 0.0349209   | 3.73922     |
| Ifi30         | AK077725           | 0.00573321  | 3.65735     |
| Agt           | AK005354           | 0.0430528   | 3.59288     |
| Htr4          | BC145161           | 0.0308461   | 3.53064     |
| Impact        | AK138136           | 0.000611422 | 3.52457     |
| Satb2         | AF319623           | 0.00132232  | 3.45963     |
| Hexa          | AK075895           | 0.00736666  | 3.43435     |
| Intu          | BC125523           | 0.00631762  | 3.30306     |
| Gm20559       | AK035387           | 0.044151    | 3.24638     |
| Map1b         | AK143169           | 0.00394713  | 3.14416     |
| Scn1b         | BC009652           | 0.0263642   | 3.14366     |
| Ankrd23       | BC023221           | 0.0406393   | 3.11308     |
| Sema6a        | AK042751           | 0.00205155  | 2.91542     |

b

| Gene Symbol | RefSeq   | q-value   | Fold-Change |
|-------------|----------|-----------|-------------|
| Pcsk6       | AK081039 | 0.0192969 | -3.54885    |
| Gm906       | BC147515 | 0.0430528 | -2.33849    |

# Supplemental table S2

List of significant genes, *PRCC-TFE3*; *Cre* (-) kidneys vs *PRCC-TFE3*; *Cre* (+) kidneys , 7 month

a

| Gene Symbol   | RefSeq             | q-value     | Fold-Change |
|---------------|--------------------|-------------|-------------|
| Gpmb          | AK044764           | 0.000585569 | 214.179     |
| Diras2        | AK041534           | 0.00275245  | 102.051     |
| Moxd1         | AK014340           | 0.0029296   | 43.3937     |
| Reln          | AK017094           | 0.000585569 | 37.3605     |
| Cd68          | AK002264           | 0.00170181  | 34.9926     |
| 201032007Rik  | AK008598           | 0.00265767  | 33.8783     |
| Tyrr1         | AK148332           | 0.0059165   | 27.1432     |
| Tgfb2         | AK029306           | 0.00452058  | 24.2587     |
| P2rx7         | AK144585           | 0.000585569 | 23.7014     |
| Nr4a1         | AK004709           | 0.00336458  | 18.1485     |
| Asb2          | U54511             | 0.0209609   | 17.3707     |
| Lhcgr         | AK030325           | 0.0279338   | 17.3564     |
| 2310043M15Rik | AK009785           | 0.00354469  | 17.0169     |
| Mmp7          | AK144515           | 0.00556877  | 15.8979     |
| Zdhhc2        | AK017566           | 0.00578387  | 13.7129     |
| Ighm          | BC096772           | 0.0434164   | 13.0555     |
| Gm3500        | AK080783           | 0.011712    | 12.9276     |
| Lcn2          | AK149774           | 0.00710393  | 12.4911     |
| Fgb           | AK011118           | 0.0166085   | 12.1747     |
| Ngfr          | AK037248           | 0.00240882  | 12.1544     |
| Fgg           | AK013887           | 0.00697408  | 11.835      |
| C3            | BC029976           | 0.00383146  | 11.541      |
| Serpina10     | AK050552           | 0.00275159  | 11.5199     |
| Mreg          | AY628210           | 0.00577126  | 11.4542     |
| Ighm          | AK041235           | 0.0212904   | 10.9226     |
| Abp1          | AK005423           | 0.00432947  | 10.7609     |
| Bex1          | BC058805           | 0.00786912  | 10.062      |
| Snap91        | AK051176           | 0.00210677  | 9.91223     |
| Efcab1        | AK015426           | 0.00936866  | 9.89861     |
| Ikv9-120      | L41880             | 0.0145791   | 9.82073     |
| Vcam1         | AK016465           | 0.000699693 | 9.32752     |
| Hk2           | AK036845           | 0.0152282   | 8.97612     |
| Gpr143        | AK033060           | 0.00537964  | 8.94302     |
| Tmem48        | BC021337           | 0.00103399  | 8.71224     |
| Chaf1b        | AK011243           | 0.00370423  | 8.52055     |
| Snx31         | AK014536           | 0.00921889  | 8.35456     |
| Hpgds         | AK020246           | 0.00828665  | 8.18497     |
| Rhou          | AK009513           | 0.0132029   | 8.17558     |
| Gabrp         | AK028946           | 0.00837834  | 7.94716     |
| Gm10338       | FNSMUST00000178623 | 0.00710393  | 7.85014     |
| H2-DMb2       | AK154923           | 0.00646858  | 7.81103     |
| Gpr64         | AK041291           | 0.00530993  | 7.7625      |
| Havcr1        | AK133466           | 0.0431935   | 7.76041     |
| 1700019D03Rik | AK006110           | 0.00329033  | 7.73588     |
| Ahna2         | BC138468           | 0.0150865   | 7.49297     |
| Ramp3         | AK005513           | 0.00265767  | 7.48763     |
| Wdr16         | BC118541           | 0.00259772  | 7.45796     |
| Cd44          | BC025635           | 0.00347684  | 7.38295     |
| Colec12       | AK042772           | 0.00558423  | 7.21024     |
| Gm20559       | AK035387           | 0.0012423   | 7.19013     |

b

| Gene Symbol | RefSeq             | q-value    | Fold-Change |
|-------------|--------------------|------------|-------------|
| Cyp2d12     | AK078880           | 0.0181137  | -9.2271     |
| Dnase1      | BC030394           | 0.0078857  | -7.39134    |
| Wfdc15b     | AK078998           | 0.00854242 | -6.17737    |
| C1qtnf3     | AK029352           | 0.0285611  | -5.94277    |
| Slc22a7     | AK082865           | 0.0465505  | -5.86695    |
| Sectm1b     | AK007321           | 0.0059165  | -5.75829    |
| Hsd3b2      | BC026757           | 0.0201391  | -5.68099    |
| Gpx6        | AK006161           | 0.00687888 | -5.65082    |
| Ren1        | AK052685           | 0.0256242  | -5.61368    |
| Gm906       | BC147515           | 0.0270683  | -5.59371    |
| Tmem207     | AK142524           | 0.00928865 | -5.48399    |
| Ttc36       | BC021608           | 0.00577126 | -5.09391    |
| F13b        | AK149397           | 0.00837834 | -5.05894    |
| Car4        | AK154754           | 0.0170545  | -4.96769    |
| Slc16a14    | AK003423           | 0.0338361  | -4.959      |
| Gm11128     | AF163316           | 0.0100561  | -4.76161    |
| Nccrp1      | NM_001081115       | 0.0414755  | -4.73613    |
| Car14       | AK009805           | 0.0084247  | -4.7044     |
| Gm906       | BC147515           | 0.0179664  | -4.67851    |
| Eef         | AK084927           | 0.00959721 | -4.63332    |
| Gatm        | AK007325           | 0.0208098  | -4.52314    |
| Acsm1       | AK149550           | 0.0141984  | -4.43361    |
| Slc22a22    | AB520670           | 0.0400878  | -4.34086    |
| Slc5a2      | AY033886           | 0.00837834 | -4.33789    |
| Cndp1       | AK085308           | 0.0269925  | -4.3028     |
| Gm906       | BC147515           | 0.0251239  | -4.28374    |
| BC024386    | BC024386           | 0.0139813  | -4.18011    |
| Fut9        | AK032177           | 0.00588281 | -4.08177    |
| Gvs2        | AK138992           | 0.0182232  | -4.03566    |
| Pcsk6       | AK081039           | 0.00973772 | -3.99414    |
| Ppp1r1a     | AK002813           | 0.00577126 | -3.99072    |
| Haac        | AK002295           | 0.00265767 | -3.97258    |
| Ranbp3l     | AK048152           | 0.00891083 | -3.96075    |
| Stxbp5l     | AK035159           | 0.0143019  | -3.91748    |
| Mep1b       | BC125627           | 0.0251592  | -3.8964     |
| Slc34a3     | AB054999           | 0.0174256  | -3.87387    |
| Acv1        | AK002423           | 0.00159528 | -3.86881    |
| St8sia1     | AK042207           | 0.0185689  | -3.85097    |
| Proc        | AF318182           | 0.025165   | -3.8168     |
| Fabp3-ps1   | FNSMUST0000070435  | 0.0142748  | -3.79485    |
| Eci3        | AK007578           | 0.00992231 | -3.79479    |
| Lrrc66      | BC031901           | 0.0154552  | -3.79045    |
| Dnep1       | AK002380           | 0.0102852  | -3.78604    |
| Fam107a     | AK044219           | 0.0221475  | -3.77189    |
| Hba-a2      | AK002222           | 0.0172278  | -3.76977    |
| Susd2       | AK004703           | 0.0145791  | -3.75377    |
| Clec2h      | AK017207           | 0.0142337  | -3.74802    |
| Hsd3b3      | BC089581           | 0.00558423 | -3.7227     |
| Phyh1p      | FNSMUST00000162793 | 0.0206239  | -3.68684    |
| Fam151a     | AK166736           | 0.0034475  | -3.67808    |

# Supplemental Fig. S2

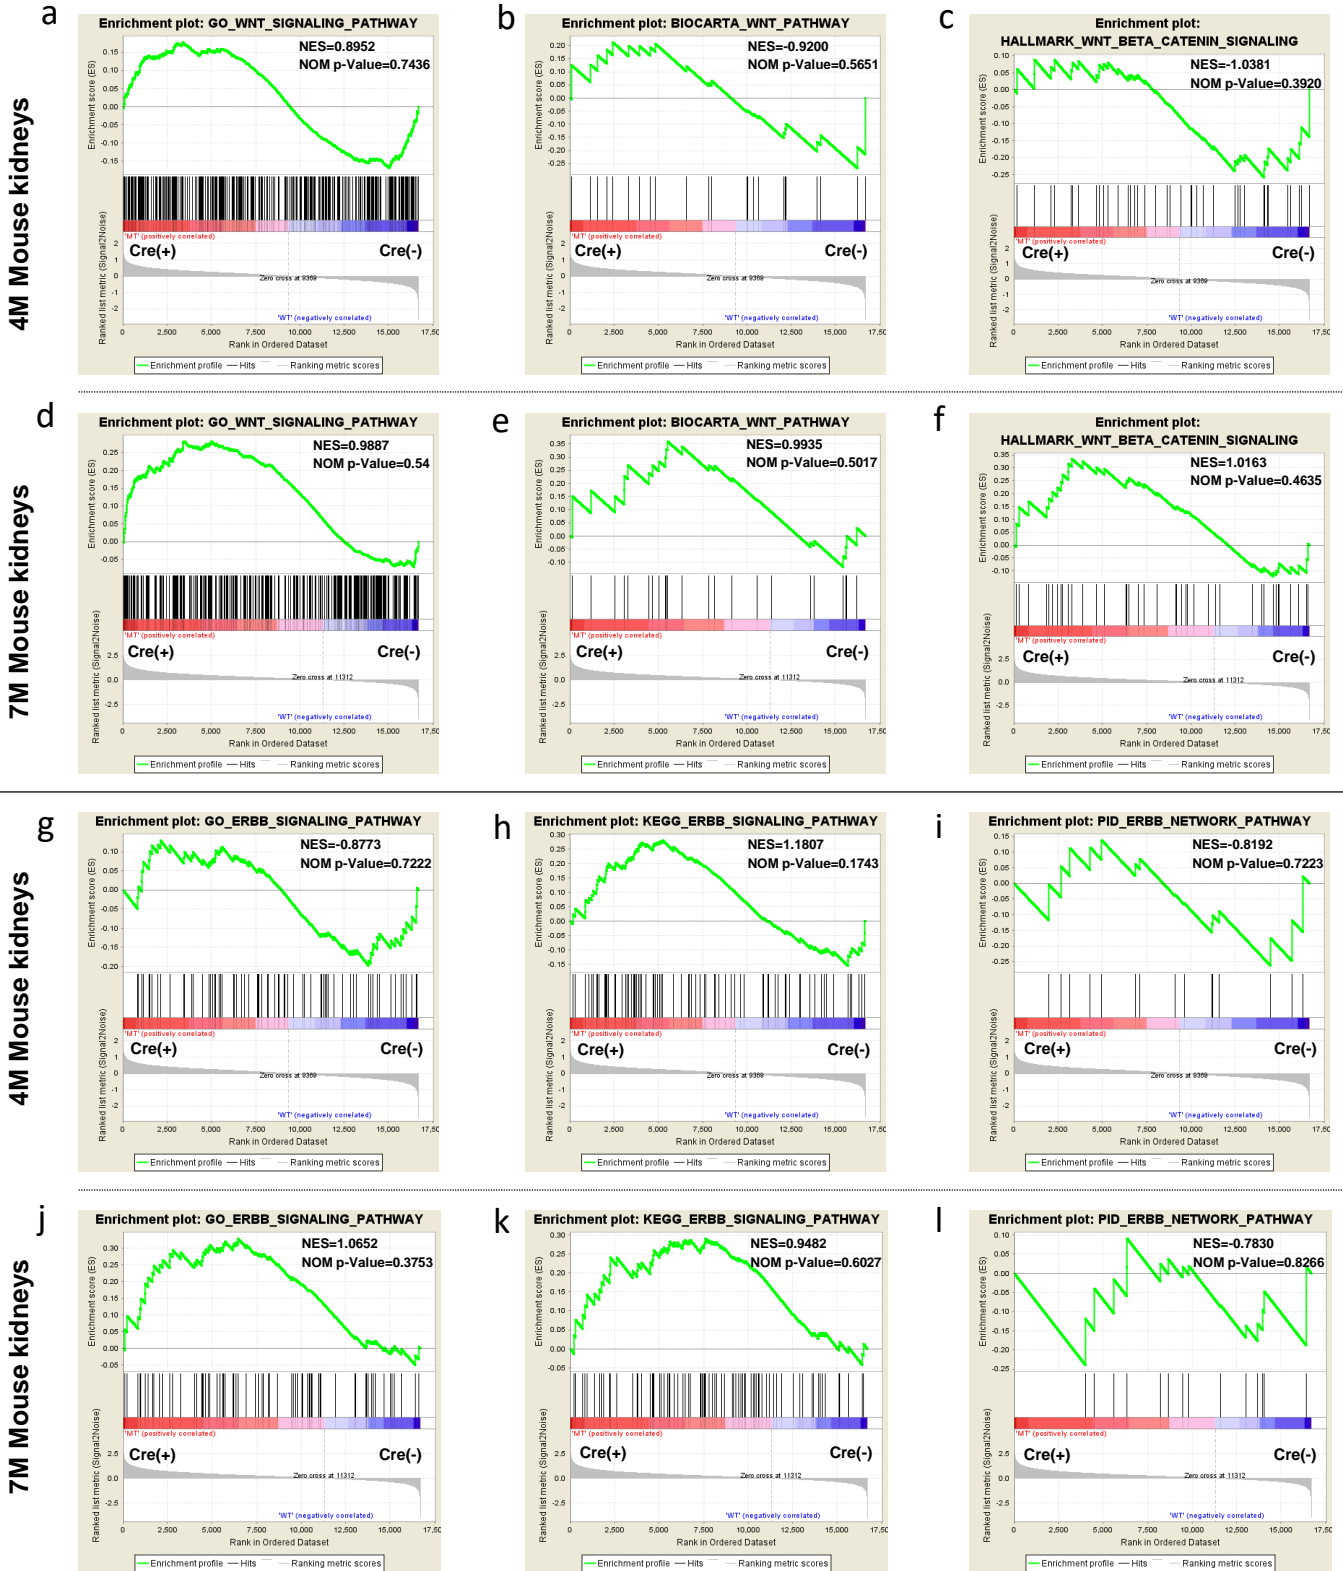

# Supplemental table S3

| TFE3 <i>q</i> -value < 0.05, 2 fold UP       | 4 month   |            | 7 month     |             |
|----------------------------------------------|-----------|------------|-------------|-------------|
|                                              | TFEB - P0 | TFEB - P14 | TFEB - P0   | TFEB - P14  |
| number of genes upregulated in both datasets | 2 (of 78) | 5 (of 78)  | 20 (of 733) | 50 (of 733) |
| % overlapping genes                          | 2.56      | 6.41       | 2.73        | 6.82        |

| Gene Symbol  | Gene Symbol  | Gene Symbol  | Gene Symbol  |
|--------------|--------------|--------------|--------------|
| <b>Gpnmb</b> | Asb11        | Bhlhe40      | Apobec3      |
| Hk2          | <b>Gpnmb</b> | Camk1d       | Asb11        |
|              | Moxd1        | Cck          | B4galnt1     |
|              | Rab27a       | Cdkn1a       | Bex1         |
|              | Trpm1        | Cldn4        | Cdc25b       |
|              |              | Cpxm2        | Cerk         |
|              |              | Cxcl16       | Chaf1b       |
|              |              | Elf3         | Cldn4        |
|              |              | Eno2         | Cldn7        |
|              |              | Gdf15        | Cstb         |
|              |              | <b>Gpnmb</b> | D17H6S56E-5  |
|              |              | Hk2          | Egr1         |
|              |              | Lgals3       | Elf3         |
|              |              | Rell1        | <b>Gpnmb</b> |
|              |              | Serpina6     | Grem1        |
|              |              | Slc34a2      | Il18r1       |
|              |              | Spr1a        | Il1r1        |
|              |              | Tspan8       | Itpr3        |
|              |              | Uap111       | Krt20        |
|              |              | Wfdc2        | Lgals3       |
|              |              |              | Map3k1       |
|              |              |              | Moxd1        |
|              |              |              | Myo1e        |
|              |              |              | Myo5c        |
|              |              |              | Nfkb2        |
|              |              |              | Nipal2       |
|              |              |              | Parm1        |
|              |              |              | Pfkp         |
|              |              |              | Plp2         |
|              |              |              | Ppfbp2       |
|              |              |              | Rab27a       |
|              |              |              | Rell1        |
|              |              |              | Rhou         |
|              |              |              | Rnase4       |
|              |              |              | Slc20a1      |
|              |              |              | Slc34a2      |
|              |              |              | Slc38a1      |
|              |              |              | Slc44a3      |
|              |              |              | Smpdl3b      |
|              |              |              | Soat1        |
|              |              |              | Stat3        |
|              |              |              | Tcrb-J       |
|              |              |              | Tlr1         |
|              |              |              | Tlr2         |
|              |              |              | Tpcn2        |
|              |              |              | Trpm1        |
|              |              |              | Trpv6        |
|              |              |              | Tspan8       |
|              |              |              | Vat1         |
|              |              |              | Wfdc2        |

# Supplemental Fig. S3

a

4M Mouse kidneys

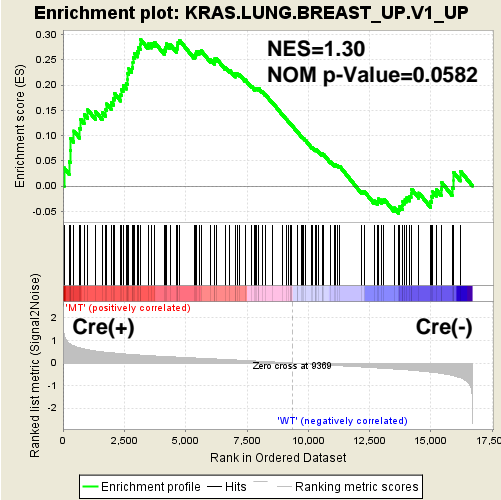

b

7M Mouse kidneys

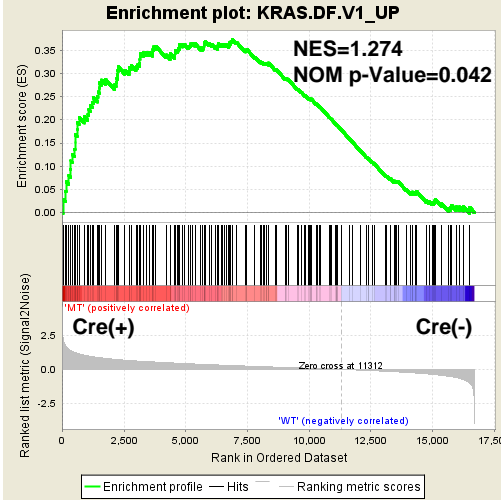

# Supplemental Fig. S4

a

## TFE3 staining score <sup>\*p=0.0377</sup>

|        | Negative  | Positive  | - | 1+ | 2+ |
|--------|-----------|-----------|---|----|----|
| Cre(-) | 100%(3/3) | 0%(0/3)   | 3 | 0  | 0  |
| Cre(+) | 0%(0/3)   | 100%(3/3) | 0 | 1  | 2  |

b

## Gpnmb staining score <sup>\* p=0.0377</sup>

|        | Negative  | Positive  | - | 1+ | 2+ |
|--------|-----------|-----------|---|----|----|
| Cre(-) | 100%(3/3) | 0%(0/3)   | 3 | 0  | 0  |
| Cre(+) | 0%(0/3)   | 100%(3/3) | 0 | 1  | 2  |

c

## Ret staining score <sup>\* p=0.0377</sup>

|        | Negative  | Positive  | - | 1+ | 2+ |
|--------|-----------|-----------|---|----|----|
| Cre(-) | 100%(3/3) | 0%(0/3)   | 3 | 0  | 0  |
| Cre(+) | 0%(0/3)   | 100%(3/3) | 0 | 1  | 2  |

d

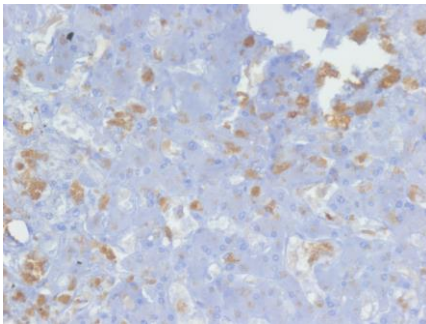

e

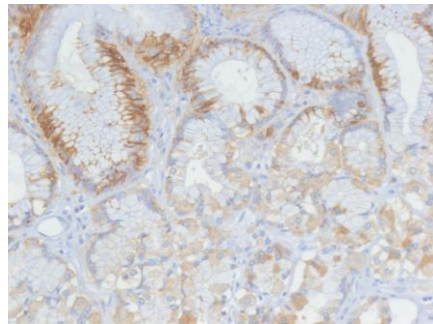

# Supplemental Fig. S5

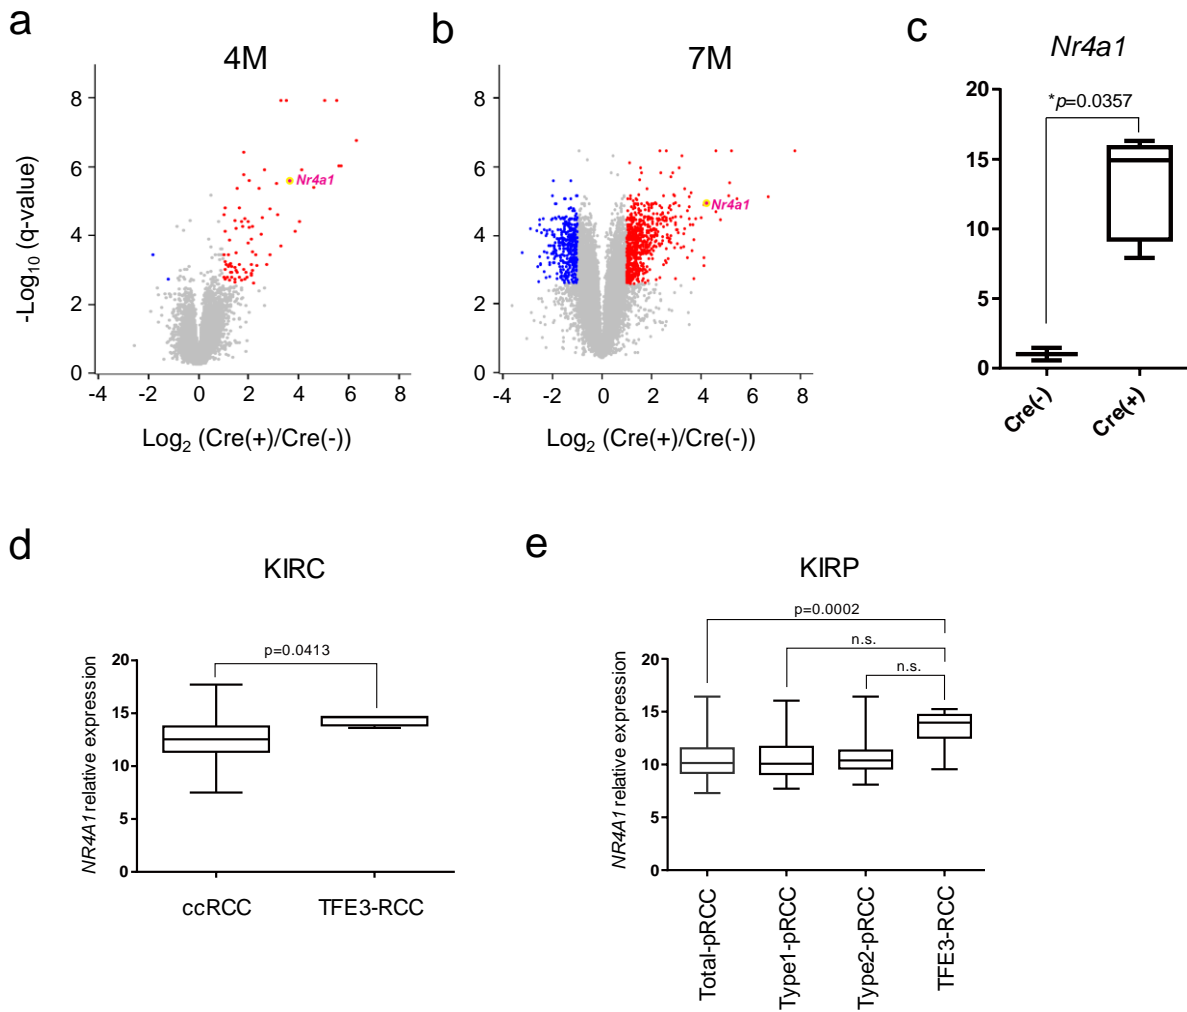

Supplement: NIHMS1528517-supplement-1.pdf [file NIHMS1528517-supplement-1.pdf]
